# Supplementary material for: Spectroscopic Signature of Red Blood Cells in a D-Galactose-Induced Accelerated Aging Model
Source: PubMed Central journal article supplement (PMC7961785; doi:10.3390/ijms22052660), 2021-03-06
Supplement: ijms-22-02660-s001.pdf [file ijms-22-02660-s001.pdf]

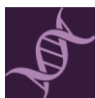

1 Article

# 2 Spectroscopic Signature of Red Blood Cells in the 3 D-galactose-Induced Accelerated Aging Model

4 Aneta Blat<sup>1,2, †</sup>, Tetiana Stepanenko<sup>1,2, †</sup>, Katarzyna Bulat<sup>1</sup>, Aleksandra Wajda<sup>1,3</sup>, Jakub Dybas<sup>1</sup>, Tasnim Mohaissen<sup>1</sup>,  
5 Fatih Celal Alcicek<sup>1</sup>, Ewa Szczesny- Malysiak<sup>1</sup>, Kamilla Malek<sup>2</sup>, Andrzej Fedorowicz<sup>4</sup> and Katarzyna M. Marzec<sup>1,\*</sup>

6 <sup>1</sup> Jagiellonian Center for Experimental Therapeutics, Jagiellonian University, 14 Bobrzynskiego Str., 30–348 Krakow, Poland;  
7 [katarzyna.bulat@jcet.eu](mailto:katarzyna.bulat@jcet.eu) (K.B.); [tasnim.mohaissen@jcet.eu](mailto:tasnim.mohaissen@jcet.eu) (T.M.); [f.celal.alcicek@jcet.eu](mailto:f.celal.alcicek@jcet.eu) (F.C.A.); [jakub.dybas@jcet.eu](mailto:jakub.dybas@jcet.eu) (J.D.); [ewa.szczesny@jcet.eu](mailto:ewa.szczesny@jcet.eu)  
8 (E.S-M.)

9 <sup>2</sup> Faculty of Chemistry, Jagiellonian University, 2 Gronostajowa Str., 30–387 Krakow, Poland; [aneta.blat@doctoral.uj.edu.pl](mailto:aneta.blat@doctoral.uj.edu.pl) (A.B.); [tetiana.stepanenko@student.uj.edu.pl](mailto:tetiana.stepanenko@student.uj.edu.pl) (T.S.); [kamilla.malek@uj.edu.pl](mailto:kamilla.malek@uj.edu.pl) (K.M.)

10 <sup>3</sup> Faculty of Materials Science and Ceramics, AGH University of Science and Technology, Al. Mickiewicza 30, 30-059 Krakow, Poland; [olawajda@agh.edu.pl](mailto:olawajda@agh.edu.pl) (A.W.)

11 <sup>4</sup> Chair of Pharmacology, Jagiellonian University, 16 Grzegorzeczka Str., 31-531 Krakow, Poland; [andrzej.fedorowicz@uj.edu.pl](mailto:andrzej.fedorowicz@uj.edu.pl) (A.F.)

12 \* Correspondence: [katarzyna.marzec@jcet.eu](mailto:katarzyna.marzec@jcet.eu); Tel.: +48-12-664-5476 (K.M.M.)

13 † Contributed equally

14 Academic Editor: Firstname Lastname; Received: date; Accepted: date; Published: date

15

16

17

18

19

20

21

22

23

24

25

26

27

28

29

30

31

32

33

34

35

36

37

38

39

40

41

42

43

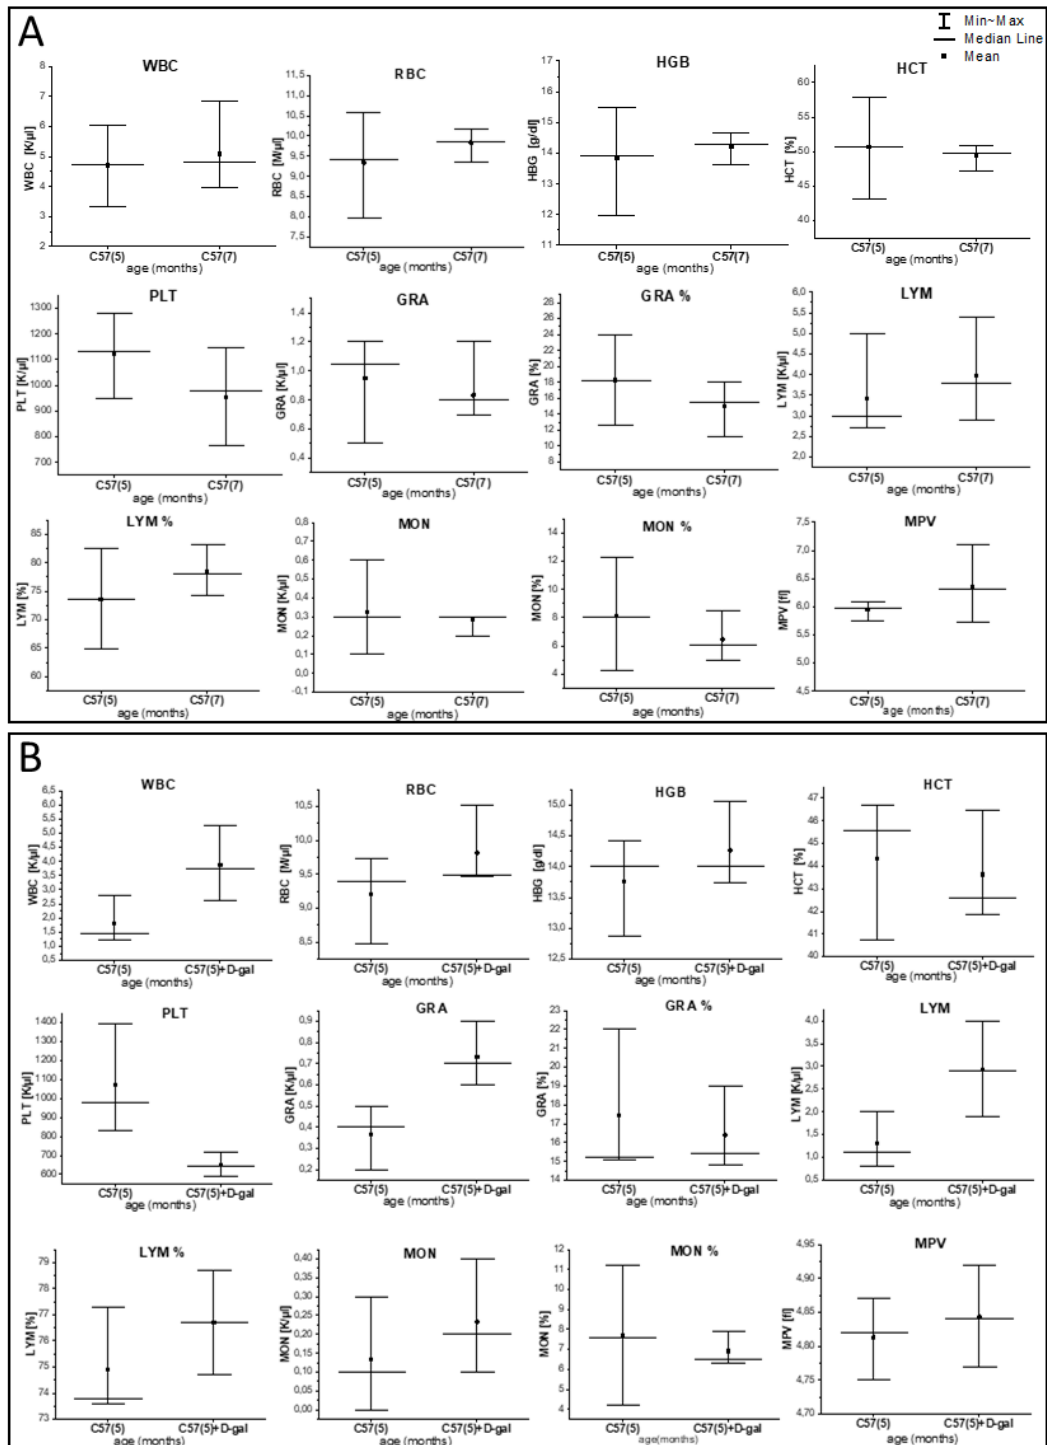

44

45 **Figure S1.** Changes in blood morphological parameters in natural aging and D-gal model. WBC, RBC, HGB, HCT, PLT, GRA, LYM,  
 46 MON, MPV for (A) 5- and 7-month-old male C57BL/6J mice (N=4 and N=6, respectively) in natural aging and (B) 5-month-old male  
 47 C57BL/6J mice in D-galactose induced aging model (N=3) with control group (N=3). Data distribution is presented as interval plots  
 48 (mean value, median, min-max whiskers). Statistical significance of the obtained values was tested with Mann-Whitney test.

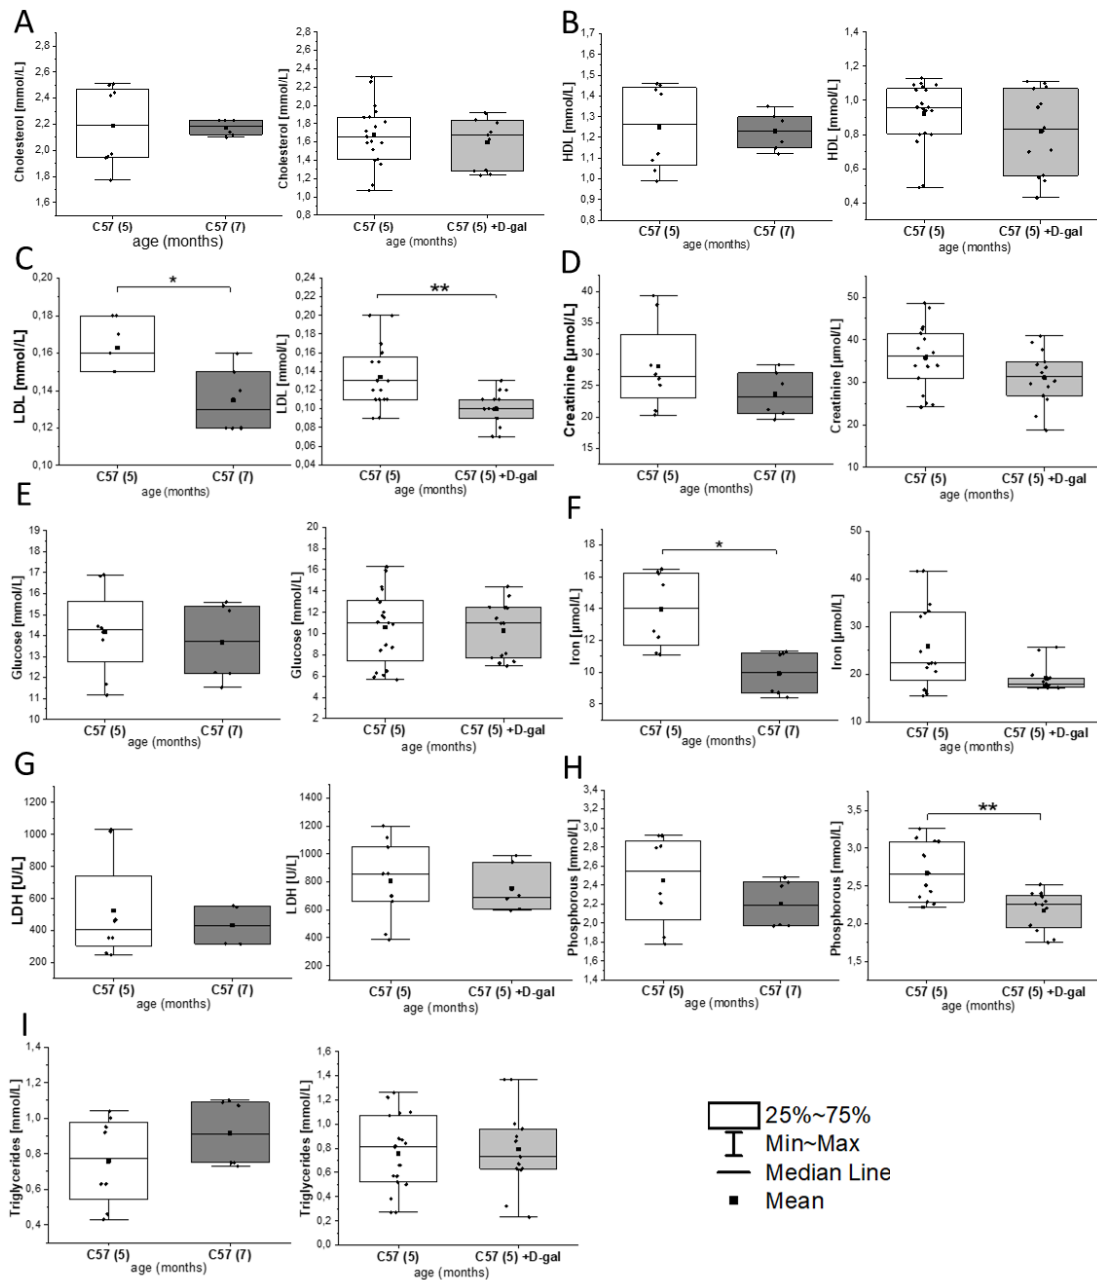

51 **Figure S2.** Biochemical parameters in blood plasma in natural aging and D-gal model. (A) Cholesterol, (B) HDL, (C) LDL, (D) cre-  
 52 atinine, (E) glucose, (F) iron, (G) LDH, (H) phosphorous and (I) triglycerides level for 5- and 7-month-old male C57BL/6J mice (N=4  
 53 and N=3, respectively) in natural aging and 5-month-old male C57BL/6J mice in D-galactose induced aging model (N=7) with con-  
 54 trol group (N=10). Data distribution is presented as box (median and interquartile range, min-max whiskers). Statisti-  
 55 cal significance of the obtained values was tested with Mann-Whitney test (\*p < 0.05; \*\*p < 0.01).

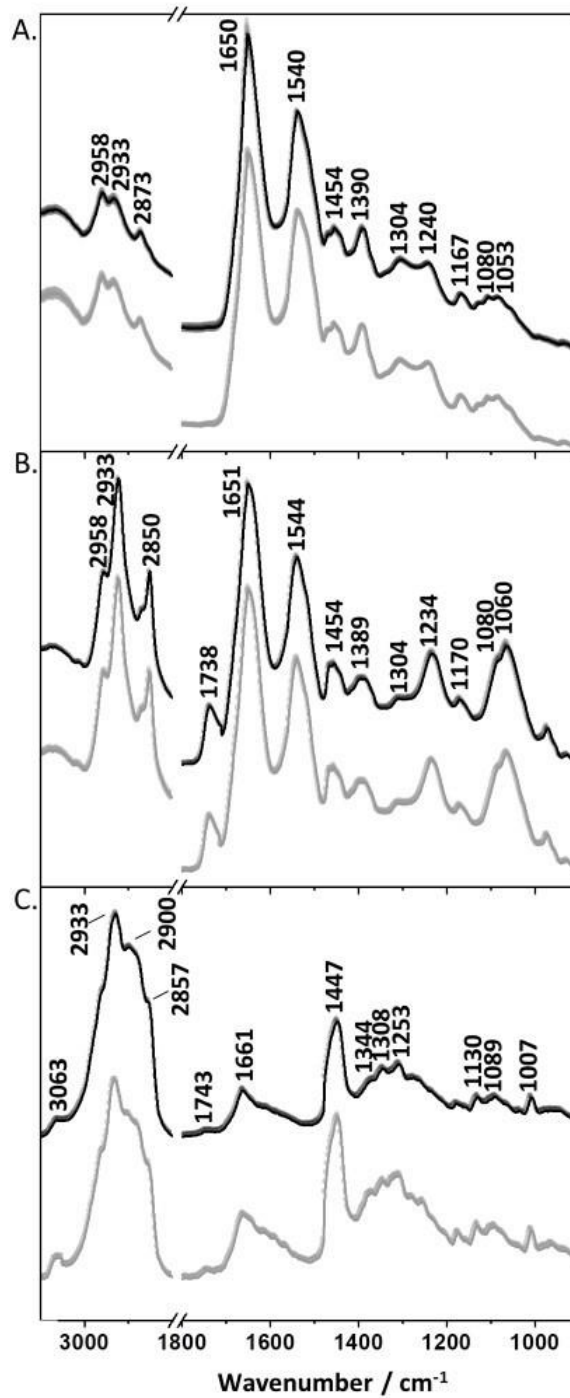

56

57 **Figure S3.** Averaged FTIR and Raman spectra with SD for RBCs and their membranes in D-gal model. FTIR spectra of intact RBCs  
 58 (A) and isolated membranes (B) and Raman spectra of isolated membranes (C) taken from control (grey) and D-galactose induced  
 59 accelerated aging mice (black).

60

61

62

63

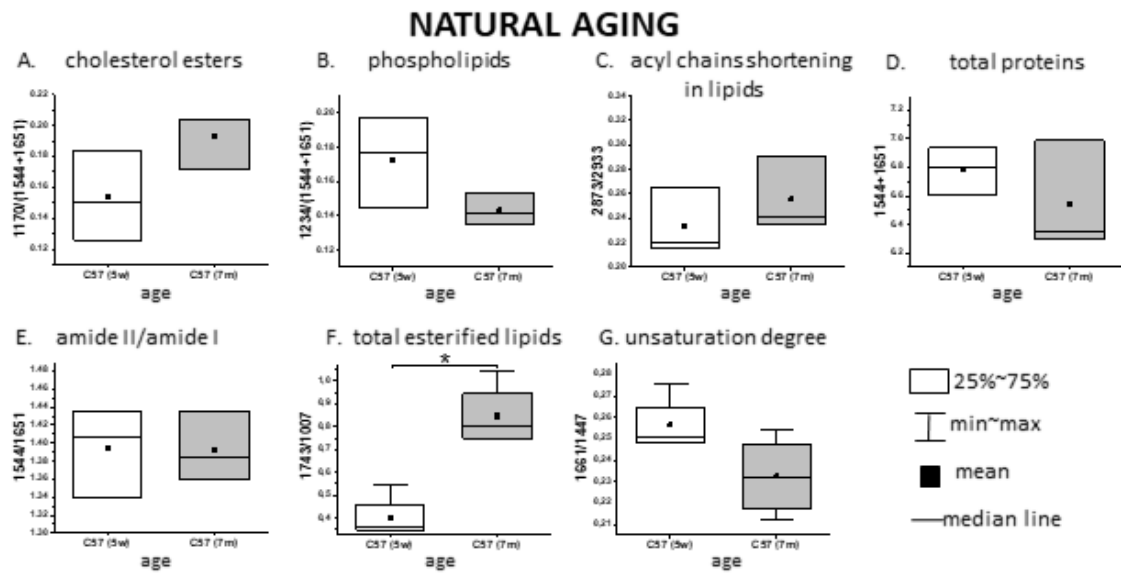

64

65 **Figure S4.** Spectroscopically – derived biochemical profile of RBC membranes in natural aging.

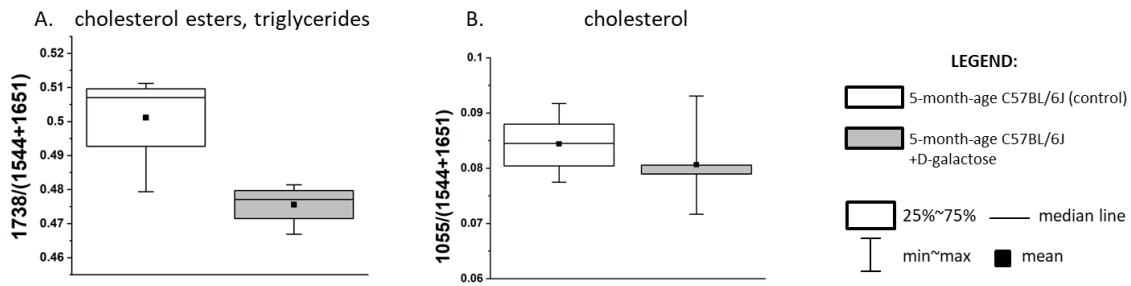

66

67 **Figure S5.** Alterations in biochemical composition of RBC membranes due to the D-galactose induced accelerated aging (C57BL/6J  
 68 and D-galactose-fed C57BL/6J mice). Ratios calculated for the integral absorbances in the ATR-FTIR spectra. **Integration regions for**  
 69 **IR bands:** amide I – 1651  $\text{cm}^{-1}$  (1687–1605  $\text{cm}^{-1}$ ); amide II – 1544  $\text{cm}^{-1}$  (1560–1502  $\text{cm}^{-1}$ ); C=O stretch- 1738  $\text{cm}^{-1}$  (1758-1727  $\text{cm}^{-1}$ ), 1055  
 70  $\text{cm}^{-1}$  (1076-1034  $\text{cm}^{-1}$ ).

71

## CHANGES IN PROFILE OF RBCs

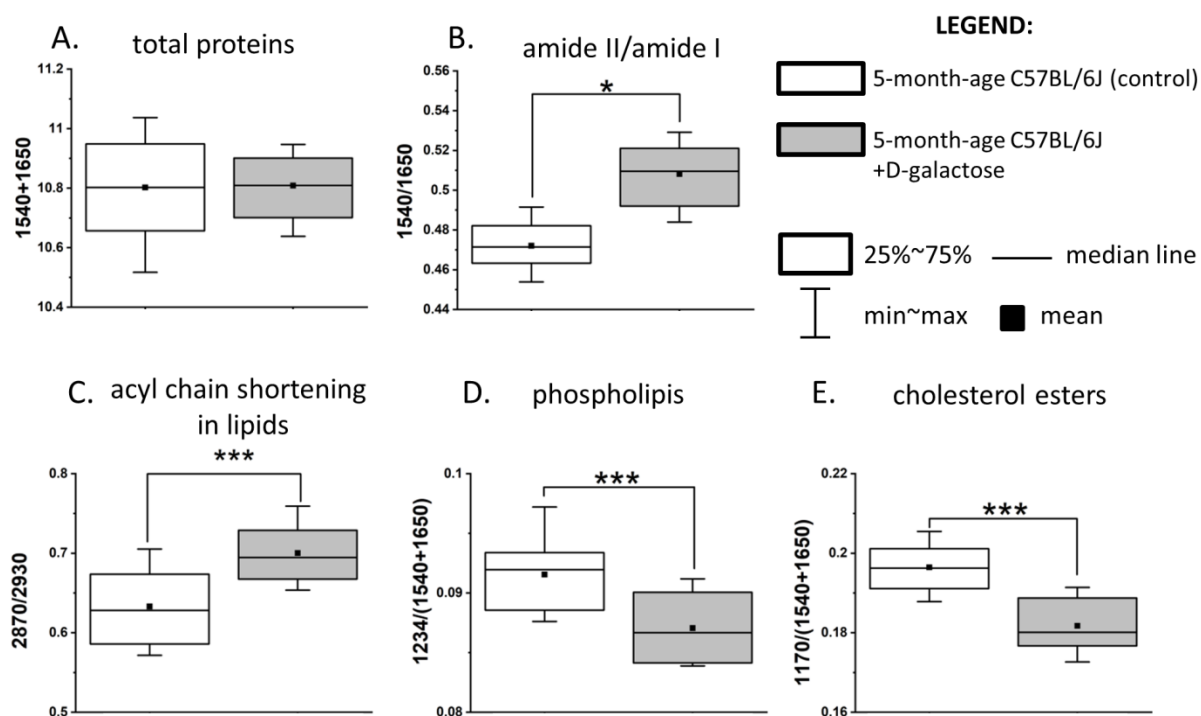

72

73 **Figure S6.** Alterations in biochemical composition of intact RBCs due to the D-galactose-induced accelerated aging (C57BL/6J and  
 74 D-galactose-fed C57BL/6J mice). Ratios calculated for the integral absorbances in the ATR-FTIR spectra. **Integration regions for IR**  
 75 **bands:** amide I – 1651  $\text{cm}^{-1}$  (1687–1605  $\text{cm}^{-1}$ ); amide II – 1544  $\text{cm}^{-1}$  (1560–1502  $\text{cm}^{-1}$ );  $\text{CH}_2$  symmetric stretch – 2933  $\text{cm}^{-1}$  (2863–2847  
 76  $\text{cm}^{-1}$ );  $\text{CH}_3$  asymmetric stretch – 2873  $\text{cm}^{-1}$  (2965–2936  $\text{cm}^{-1}$ );  $\text{PO}_2^-$  asymmetric stretch – 1236  $\text{cm}^{-1}$  (1261–1214  $\text{cm}^{-1}$ );  $-\text{CO}-\text{O}-\text{C}$  stretch  
 77 – 1167  $\text{cm}^{-1}$  (1191–1144  $\text{cm}^{-1}$ ).

78

79
